# Supplementary material for: The general control nonderepressible-2 kinase mediates stress response and longevity induced by target of rapamycin inactivation in Caenorhabditis elegans
Source: PubMed Central journal article supplement (PMC4225475; doi:10.1111/acel.12101), 2013-06-28
Supplement: acel0012-0742-sd1.pdf [file acel0012-0742-sd1.pdf]

## Supporting Information

**Fig. S1**

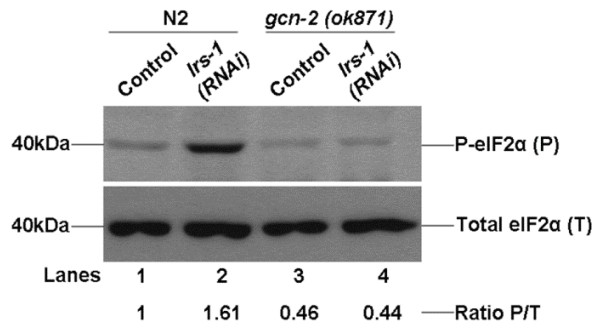

**Fig. S1:** Inactivation of leucyl-tRNA synthetase *lrs-1* induces phospho-eIF2 $\alpha$  levels in a *gcn-2*-dependent manner. Western blot analysis showing the levels of phosphorylated eIF2 $\alpha$  (P-eIF2 $\alpha$ ), normalized by the total amount of eIF2 $\alpha$ , in whole extracts of 1-day N2 and *gcn-2(ok871)* worms, fed RNAi bacteria harboring the empty vector (Control) or expressing dsRNA for *lrs-1*.

**Fig. S2**

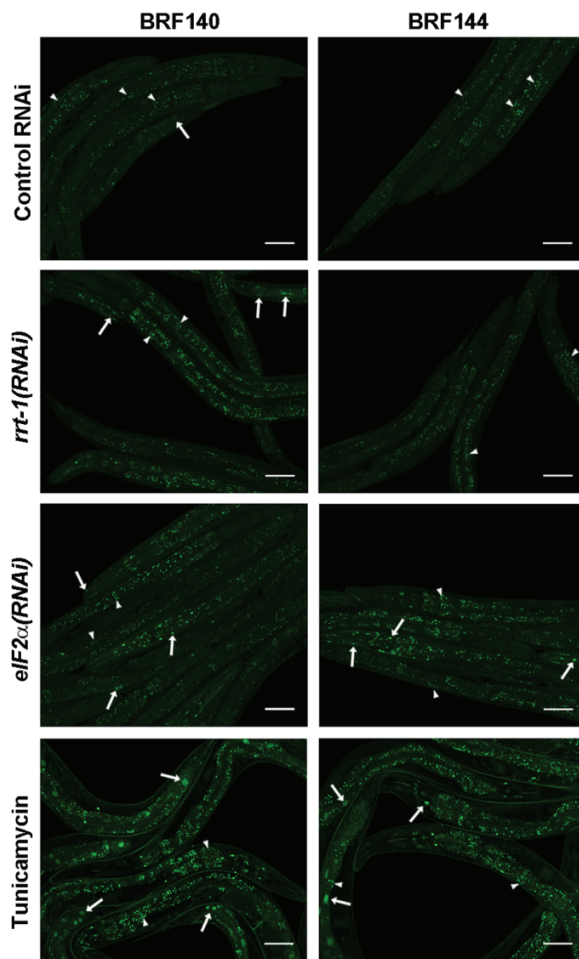

**Fig. S2:** Induction of *atf-5::gfp* transgene by *eIF2 $\alpha$* (RNAi) or tunicamycin does not require GCN-2 activity. Confocal images of adult transgenic worms BRF140 (N2Ex[ATF-5::GFP; pRF4]) and BRF144 (*gcn-2(ok871)*)Ex[ATF-5::GFP; pRF4]) that were fed Control, *rrt-1*(RNAi) or *eIF2 $\alpha$* (RNAi) bacteria, or were treated with tunicamycin (5 $\mu$ g/ml for 24h). White arrows indicate fluorescent nuclei and white arrowheads show regions of autofluorescence. All images were taken at 20x magnification (scale bar: 50 $\mu$ m).

**Fig. S3**

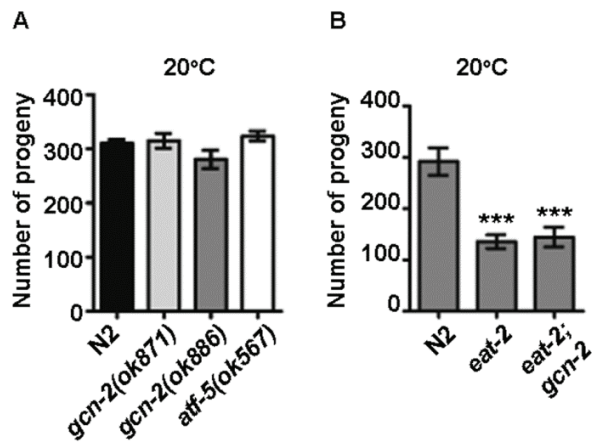

**Fig. S3:** *gcn-2* deletion does not alter fertility in wild-type or *eat-2* mutants. Brood size (mean  $\pm$  SD) of 5-10 individuals of the indicated strains at 20°C: **(A)** N2, *gcn-2(ok871)*, *gcn-2(ok886)* and *atf-5(ok567)*. **(B)** N2, *eat-2* and *eat-2;gcn-2* mutant animals. The asterisks represent statistical significant difference from N2 (\*\**p*<0.001 in unpaired t-test).

**Fig. S4**

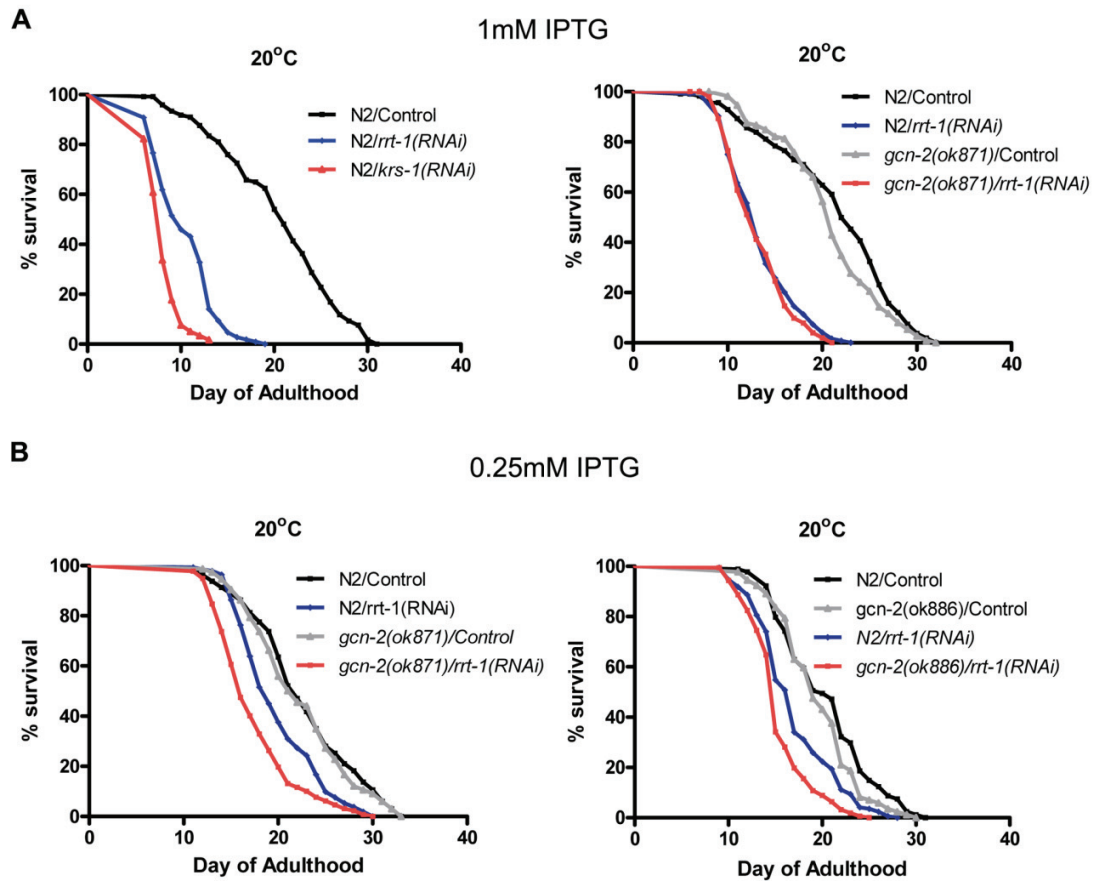

**Fig. S4:** Loss of GCN-2 sensitizes animals to amino acid limitation. **(A)** Survival curves of N2 and *gcn-2* mutant worms subjected to strong RNAi conditions (1mM IPTG) to inactivate *rrt-1* or *krs-1*, compared to empty vector (Control), at 20°C. **(B)** Survival curves of N2 and *gcn-2* mutant worms subjected to weak RNAi conditions (0.25mM IPTG) to inactivate *rrt-1* gene, compared to empty vector (Control), at 20°C. See Table 2 for additional data.

**Fig. S5**

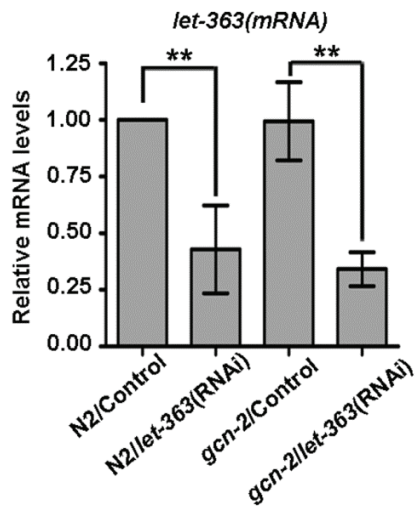

**Fig. S5:** RNAi efficiency is not affected in *gcn-2* mutant worms. qRT-PCR of *let-363* transcript on N2 and *gcn-2* worms, subjected to Control RNAi or *let-363(RNAi)* expressing bacteria for 4 days. The asterisks represent statistical significant difference (\* $p < 0.05$ , \*\* $p < 0.01$ , \*\*\* $p < 0.001$  in unpaired t-test).

**Fig. S6**

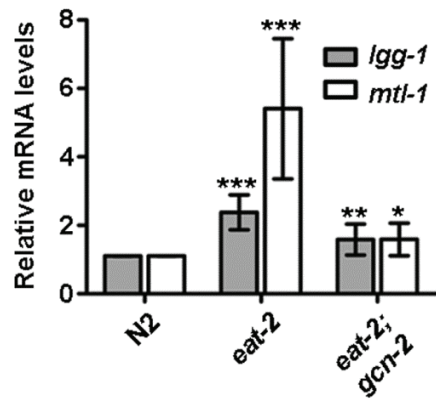

**Fig. S6:** GCN-2 regulates the induction of PHA-4 target genes in *eat-2* mutants. qRT-PCR of *lgg-1* and *mtl-1* transcript levels in 1-day adults of N2, *eat-2* and *eat-2;gcn-2* raised on OP-50 bacteria at 20°C. The asterisks represent statistical significant difference from N2 (\*p<0.05, \*\*p<0.01, \*\*\*p<0.001 in unpaired t-test)

**Fig. S7**

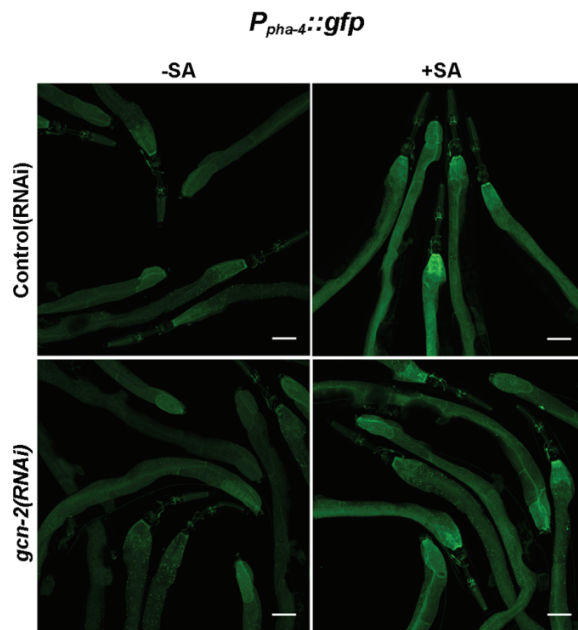

**Fig. S7:** Inactivation of *gcn-2* affects the induction of a  $P_{pha-4}::gfp$  reporter under oxidative stress. Confocal images of 1-day adults expressing a membrane-bound GFP under the *pha-4* promoter (SM481strain), fed for two generations either Control RNAi or *gcn-2(RNAi)* expressing bacteria and treated (+SA) or not (-SA) with sodium arsenite (15mM for 3h before observation). All images were taken at 20x magnification under the same microscopy settings (scale bar: 50 $\mu$ m).

**Fig.S8**

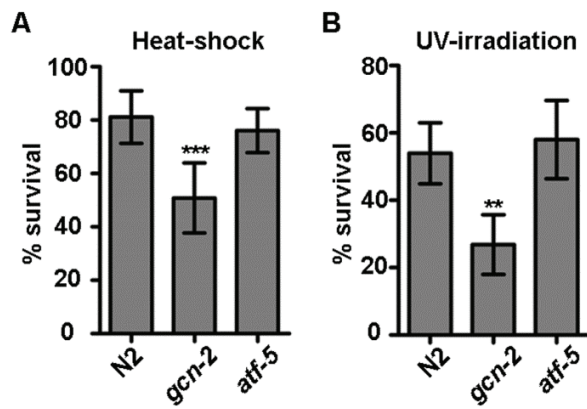

**Fig. S8:** Loss of *gcn-2* but not *atf-5* increases the stress sensitivity of worms. **(A)** Survival of 1-day old N2, *gcn-2* and *atf-5* adults subjected to heat-shock (35°C for 6h). **(B)** Survival of 5-day old N2, *gcn-2* and *atf-5* adults after UV-irradiation (0.2J/cm<sup>2</sup>).



**Table S1: List of the strains used in this study**

| Strain | Genotype                                                                      | Information                                                                  | Reference  |
|--------|-------------------------------------------------------------------------------|------------------------------------------------------------------------------|------------|
| N2     |                                                                               | Wild-type                                                                    |            |
| BRF162 | <i>gcn-2(ok871 II)</i>                                                        | Backcrossed to N2 4x                                                         | This study |
| BRF163 | <i>gcn-2(ok881 II)</i>                                                        | Backcrossed to N2 4x                                                         | This study |
| BRF172 | <i>atf-5(ok576 X)</i>                                                         | Backcrossed to N2 4x                                                         | This study |
| DA465  | <i>eat-2(ad465 II)</i>                                                        | Point mutation of Y48B6A.4.<br>Backcrossed to N2 1x                          | CGC        |
| BRF178 | <i>gcn-2(ok871I);eat-2(ad465 II)</i>                                          | From crossing of BRF162<br>with DA465                                        | This study |
| BRF140 | N2 Ex[ATF-5::GFP;pRF4 <i>rol-6(su1006)</i> ]                                  | Translational fusion of the<br>intact gene T04C10.4 under<br>its promoter    | This study |
| BRF144 | <i>gcn-2(ok871)Ex[ATF-5::GFP;pRF4<br/><i>rol-6(su1006)</i>]</i>               | From crossing of BRF140<br>with BRF162                                       | This study |
| BRF152 | N2 Ex[ <sub>-uORFs</sub> ATF-5::GFP;pRF4 <i>rol-6(su1006)</i> ]               | Translational fusion of the<br>uORF-less gene T04C10.4<br>under its promoter | This study |
| SM481  | pxIs10[P <sub><i>pha-4</i></sub> ::GFP::CAAX ; pRF4<br><i>rol-6(su1006)</i> ] | Membrane-bound GFP under<br>the <i>pha-4</i> promoter                        | CGC        |
| KX15   | <i>ife-2(ok306 X)</i>                                                         | Deletion of R04A9.4 ( <i>ife-2</i> )                                         | CGC        |

**Table S2: List of primers used in this study**

| <b>Primer</b> | <b>Sequence (5' to 3')</b>         | <b>Used for</b>                                |
|---------------|------------------------------------|------------------------------------------------|
| GCN-2/1 (G1)  | GCGATTGATGTTGTTCCAG                | <i>gcn-2(ok871 and ok886)</i> genotyping       |
| GCN-2/2 (G2)  | GAGACCACATCCATCGC                  | >>                                             |
| GCN-2/3 (G3)  | GTGAGTAGACTCGTCCG                  | >>                                             |
| ATF-5/1 (A1)  | ACATGGCATGCATGATTTATAACGGAAGTTCAG  | <i>atf-5(ok576)</i> genotyping                 |
| ATF-5/2 (A2)  | GGTCTAGAAATTTTCAGATGAGATGTTTCTGCG  | >>                                             |
| Eat-2/1 (E1)  | GCTAGTCGATTTTCATCATCG              | <i>eat-2(ad465)</i> genotyping                 |
| Eat-2/2 (E2)  | GGCTAACCTTCAAATAGCAAAC             | >>                                             |
| GCN-2/4 (G4)  | CTACCTACTCTCGAGTTCC                | <i>gcn-2(RNAi)</i> construct                   |
| GCN-2/6 (G6)  | AACTGCAGCTCATTGCTTCCAGCG           | >>                                             |
| ATF-5/3 (A3)  | AACTGCAGAGTCGTCTCCCTTTCCTC         | <i>atf-5(RNAi)</i> construct                   |
| ATF-5/4 (A4)  | CGGGATCCGTCGGTGACAGTTTTTCATTC      | >>                                             |
| RRT-1/1 (R1)  | GGCAGATCTGGATACTCTGACTACTCAG       | <i>rrt-1(RNAi)</i> construct                   |
| RRT-1/2 (R2)  | GGCCTGCAGCAGCTTCAACATACTCG         | >>                                             |
| KRS-1/1 (K1)  | GCGCCATGGCAAGCCAAGAAGGAACAAG       | <i>krs-1(RNAi)</i> construct                   |
| KRS-1/2 (K2)  | GGGCTGCAGCGAGTGGTGACATGATTTG       | >>                                             |
| ATF-5/1 (A1)  | ACATGGCATGCATGATTTATAACGGAAGTTCAG  | <i>P<sub>atf-5</sub>::atf-5::gfp</i> construct |
| ATF-5/4 (A4)  | CGGGATCCGTCGGTGACAGTTTTTCATTC      | >>                                             |
| ATF-5/2 (A2)  | GGTCTAGAAATTTTCAGATGAGATGTTTCTGCG  | <i>P<sub>atf-5</sub>::gfp</i> construct        |
| ATF-5/5 (A5)  | GGTCTAGAATGGCTTATGTAAATGAACAAAATCC | <i>-uORF::atf-5::gfp</i> construct             |
| LRS-1/1 (L1)  | GGCAAGCTTCAAGGATGATAAGGGAAGTGG     | <i>lrs-1(RNAi)</i> construct                   |
| LRS-1/2 (L2)  | GGCCTCGAGCACGAAGCATCTGTCATCTG      | >>                                             |
| PHA-4/1 (P1)  | CCCAAGCTTGCGGTCATCGGAAGAAGC        | <i>pha-4(RNAi)</i> construct                   |
| PHA-4/2 (P2)  | CCGCTCGAGCTGGTATACTCCGTTGGTG       | >>                                             |

**Table S3: Summary of Data from independent repeats of lifespan assays**

|           | Strain/RNAi                      | Treatment<br>(Temp/IPTG) | Median/Max<br>Lifespan<br>(days) <sup>b</sup> | Mean<br>lifespan ±<br>s.e.m<br>(days) <sup>c</sup> | Number<br>(T/C) <sup>d</sup> | p-value<br>against<br>N2 <sup>e</sup> | p-value<br>against<br>specific<br>control <sup>f</sup> |
|-----------|----------------------------------|--------------------------|-----------------------------------------------|----------------------------------------------------|------------------------------|---------------------------------------|--------------------------------------------------------|
| Fig. 4A   | N2                               | 20°C                     | 20/29.5                                       | 20.5±0.5                                           | 64/2                         |                                       |                                                        |
|           | <i>gcn-2(ok871)</i>              | >>                       | 21/31.4                                       | 20.67±0.33                                         | 116/4                        | 0.7592                                |                                                        |
|           | <i>gcn-2(ok886)</i>              | >>                       | 20/29.3                                       | 20.33±1.2                                          | 101/2                        | 0.5729                                |                                                        |
|           | <i>atf-5(ok576)</i>              | >>                       | 19/26.6                                       | 18.17±0.6                                          | 100/2                        | 0.0117                                |                                                        |
|           | N2                               | 20°C                     | 24/32.4                                       | 24.17±0.44                                         | 85/5                         |                                       |                                                        |
|           | <i>gcn-2(ok871)</i>              | >>                       | 23/31.9                                       | 23±0.57                                            | 78/9                         | 0.4991                                |                                                        |
|           | <i>gcn-2(ok886)</i>              | >>                       | 23/29.8                                       | 23.17±0.61                                         | 77/2                         | 0.0219                                |                                                        |
|           | <i>atf-5(ok576)</i>              | >>                       | 22/28.4                                       | 22.33±0.33                                         | 109/5                        | 0.0001                                |                                                        |
|           | N2                               | 20°C                     | 21/28.6                                       | 21±0.67                                            | 82/12                        |                                       |                                                        |
|           | <i>gcn-2(ok871)</i>              | >>                       | 22/27.9                                       | 22±1.00                                            | 83/13                        | 0.9383                                |                                                        |
| Fig. 4C   | <i>eat-2(ad465)</i>              | 20°C                     | 24/33.3                                       | 23.5±0.5                                           | 71/3                         |                                       |                                                        |
|           | <i>gcn-2(ok871);eat-2(ad465)</i> | >>                       | 19/29.3                                       | 19.33±0.33                                         | 117/4                        | <0.0001                               |                                                        |
| Fig. 4B   | N2/Control                       | 20°C                     | 24/32.2                                       | 24±1                                               | 80/4                         |                                       |                                                        |
|           | N2/ <i>gcn-2</i> (RNAi)          | >>                       | 25/32.8                                       | 25.33±0.33                                         | 92/2                         | 0.1738                                |                                                        |
|           | N2/ <i>atf-5</i> (RNAi)          | >>                       | 23/30.7                                       | 23.25±0.75                                         | 84/1                         | 0.0536                                |                                                        |
| Fig. S4 A | N2/Control                       | 20°C/1mM                 | 21/28.7                                       | 20.83±0.6                                          | 120/4                        |                                       |                                                        |
|           | N2/ <i>rrt-1</i> (RNAi)          | >>                       | 13/19.5                                       | 12.67±0.33                                         | 112/9                        | <0.0001                               |                                                        |
|           | N2/ <i>krs-1</i> (RNAi)          | >>                       | 12/14.5                                       | 11.67±0.33                                         | 114/2                        | <0.0001                               |                                                        |
|           | <i>gcn-2(ok871)</i> /Control     | >>                       | 18/28.5                                       | 19±0.57                                            | 113/6                        | 0.1614                                |                                                        |
|           | <i>gcn-2(ok871)/rrt-1</i> (RNAi) | >>                       | 12/19.3                                       | 12.67±0.33                                         | 122/12                       | <0.0001                               | 0.1534                                                 |
|           | <i>gcn-2(ok871)/krs-1</i> (RNAi) | >>                       | 11/14.7                                       | 10.67±0.33                                         | 123/3                        | <0.0001                               | 0.0009                                                 |
|           | <i>gcn-2(ok886)</i> /Control     | >>                       | 17/29.4                                       | 17.67±0.88                                         | 114/7                        | 0.2635                                |                                                        |
|           | <i>gcn-2(ok886)/rrt-</i>         | >>                       | 13/20.1                                       | 12.5±0.28                                          | 120/6                        | <0.0001                               | 0.6139                                                 |
